# Supplementary material for: Developmental Transcriptional Networks Are Required to Maintain Neuronal Subtype Identity in the Mature Nervous System
Source: PubMed Central journal article supplement (PMC3285578; doi:10.1371/journal.pgen.1002501), 2012-02-23

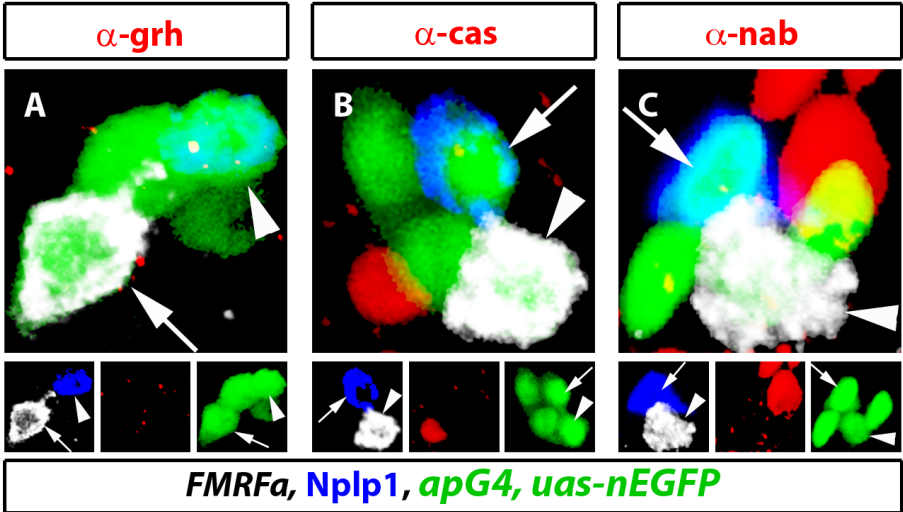

Supplement: pgen.1002501.s001.pdf [file pgen.1002501.s001.pdf]
