# Supplementary material for: Developmental Transcriptional Networks Are Required to Maintain Neuronal Subtype Identity in the Mature Nervous System
Source: PubMed Central journal article supplement (PMC3285578; doi:10.1371/journal.pgen.1002501), 2012-02-23

*ap<sup>GAL4</sup>* X

*w<sup>1118</sup>*

*ap<sup>RK</sup>*

*ap dsRNAi 8376R-2*

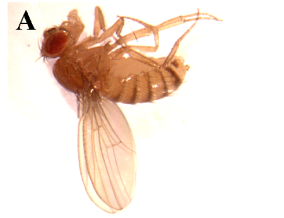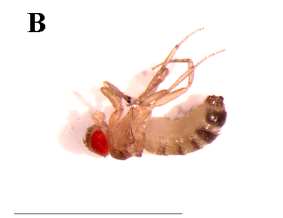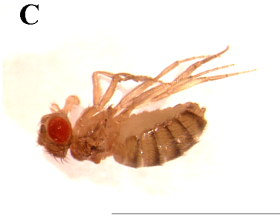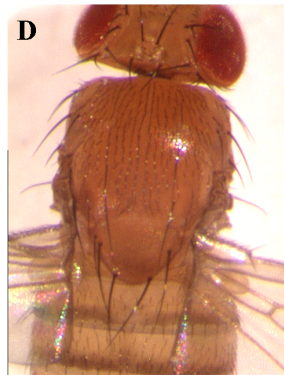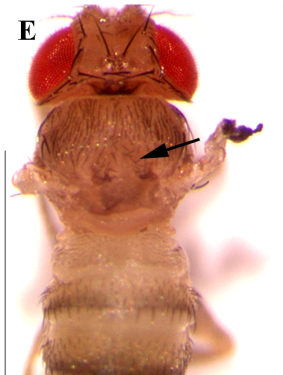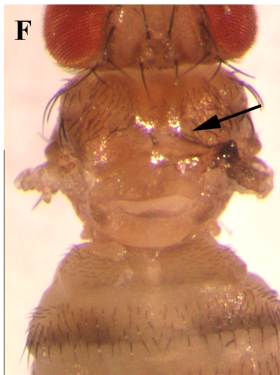

Supplement: pgen.1002501.s002.pdf [file pgen.1002501.s002.pdf]
