# Supplementary material for: Developmental Transcriptional Networks Are Required to Maintain Neuronal Subtype Identity in the Mature Nervous System
Source: PubMed Central journal article supplement (PMC3285578; doi:10.1371/journal.pgen.1002501), 2012-02-23
Supplement: pgen.1002501.s004.pdf [file pgen.1002501.s004.pdf]

| FMRFa peptide                                 |    |              |    |         |
|-----------------------------------------------|----|--------------|----|---------|
| control                                       | n  | experimental | n  | P value |
| <i>ap<sup>P44</sup>; ap<sup>dsRNAi</sup></i>  |    |              |    |         |
| 100.0±10.0%                                   | 20 | 65.2±5.4%    | 16 | 0.007   |
| <i>eya<sup>dsRNAi</sup></i>                   |    |              |    |         |
| 100.0±9.3%                                    | 34 | 22.2±3.6%    | 38 | <0.0001 |
| <i>sqz<sup>dsRNAi</sup>; sqz<sup>IE</sup></i> |    |              |    |         |
| 100.0±11.4%                                   | 15 | 51.1±11.9%   | 15 | 0.008   |
