# Supplementary material for: Developmental Transcriptional Networks Are Required to Maintain Neuronal Subtype Identity in the Mature Nervous System
Source: PubMed Central journal article supplement (PMC3285578; doi:10.1371/journal.pgen.1002501), 2012-02-23
Supplement: pgen.1002501.s005.pdf [file pgen.1002501.s005.pdf]

| <i>dsRNAi</i> line                         | Wild type  | n  | experimental | n  | P value | Induction time |
|--------------------------------------------|------------|----|--------------|----|---------|----------------|
| <b><i>ap</i><sup><i>dsRNAi</i></sup></b>   |            |    |              |    |         |                |
| JF02311                                    | 100.0±8.2% | 34 | 61.25±6.7%   | 29 | <0.0001 | 20days         |
| <b><i>eya</i><sup><i>dsRNAi</i></sup></b>  |            |    |              |    |         |                |
| JF03160                                    | 100.0±8.0% | 32 | 50.6±5.9%    | 27 | <0.0001 | 20 days        |
| 108071KK                                   | 100.0±8.0% | 32 | 27.0±4.7%    | 27 | <0.0001 | 20 days        |
| <b><i>dac</i><sup><i>dsRNAi</i></sup></b>  |            |    |              |    |         |                |
| JF02322                                    | 100.0±6.0% | 19 | 52.9±8.5%    | 13 | <0.0001 | 15 days        |
| <b><i>dimm</i><sup><i>dsRNAi</i></sup></b> |            |    |              |    |         |                |
| 103356KK                                   | 100.0±5.6% | 27 | 40.8±3.1%    | 36 | <0.0001 | 15 days        |
