# Supplementary material for: Developmental Transcriptional Networks Are Required to Maintain Neuronal Subtype Identity in the Mature Nervous System
Source: PubMed Central journal article supplement (PMC3285578; doi:10.1371/journal.pgen.1002501), 2012-02-23
Supplement: pgen.1002501.s006.pdf [file pgen.1002501.s006.pdf]

| <b>Tv4</b>                                    |             |    |              |    |         |
|-----------------------------------------------|-------------|----|--------------|----|---------|
| TF                                            | control     | n  | experimental | n  | P value |
| <i>ap<sup>dsRNAi</sup></i>                    |             |    |              |    |         |
| Eyes absent                                   | 100.0±6.4%  | 11 | 119.4±9.3%   | 14 | 0.12    |
| Dachshund                                     | 100.0±8.0%  | 22 | 117.0±10.8%  | 15 | 0.20    |
| <i>eya<sup>dsRNAi</sup></i>                   |             |    |              |    |         |
| Apterous                                      | 100.0±8.5%  | 16 | 95.1±8.0%    | 16 | 0.68    |
| Dachshund                                     | 100.0±7.3%  | 20 | 95.3±5.7%    | 22 | 0.61    |
| <i>dac<sup>dsRNAi</sup></i>                   |             |    |              |    |         |
| Apterous                                      | 100.0±6.2%  | 47 | 109.0±14.6%  | 24 | 0.51    |
| Eyes absent                                   | 100.0±6.1%  | 44 | 82.1±8.5%    | 26 | 0.08    |
| Dimmed                                        | 100.0±5.6%  | 35 | 94.9±8.0%    | 19 | 0.60    |
| <i>dimm<sup>dsRNAi</sup></i>                  |             |    |              |    |         |
| Apterous                                      | 100.0±10.1% | 18 | 102±8.1%     | 18 | 0.88    |
| Dachshund                                     | 100.0±7.8%  | 14 | 95.0±8.0%    | 11 | 0.66    |
| Eyes absent                                   | 100.0±6.4%  | 18 | 166.5±13.4%  | 18 | <0.0001 |
| <i>sqz<sup>dsRNAi</sup>, sqz<sup>IE</sup></i> |             |    |              |    |         |
| Apterous                                      | 100.0±11.4% | 13 | 111.0±9.1%   | 14 | 0.46    |
| Dachshund                                     | 100.0±7.7%  | 14 | 91.2±2.6%    | 18 | 0.25    |
| Eyes absent                                   | 100.0±15.8% | 16 | 95.2±7.3%    | 18 | 0.77    |
| Dimmed                                        | 100.0±7.5%  | 13 | 114.2±7.5%   | 14 | 0.25    |

| <b>Tv1</b>                   |             |    |              |    |         |
|------------------------------|-------------|----|--------------|----|---------|
| TF                           | control     | n  | experimental | n  | P value |
| <i>ap<sup>dsRNAi</sup></i>   |             |    |              |    |         |
| Eyes absent                  | 100.0±6.5%  | 16 | 88.8±7.0%    | 15 | 0.24    |
| Collier                      | 100.0±7.2%  | 17 | 142.3±9.5%   | 20 | 0.25    |
| <i>eya<sup>dsRNAi</sup></i>  |             |    |              |    |         |
| Apterous                     | 100.0±11.3% | 17 | 148.1±16.0%  | 19 | 0.02    |
| Collier                      | 100.0±6.4%  | 17 | 123.9±8.6%   | 19 | 0.03    |
| <i>dimm<sup>dsRNAi</sup></i> |             |    |              |    |         |
| Apterous                     | 100.0±11.4% | 29 | 92.3±10.3%   | 23 | 0.62    |
| Collier                      | 100.0±10.1% | 15 | 107.2±5.9%   | 15 | 0.54    |
| Eyes absent                  | 100.0±4.8%  | 29 | 122.4±6.3%   | 23 | 0.006   |
