# Supplementary material for: Developmental Transcriptional Networks Are Required to Maintain Neuronal Subtype Identity in the Mature Nervous System
Source: PubMed Central journal article supplement (PMC3285578; doi:10.1371/journal.pgen.1002501), 2012-02-23
Supplement: pgen.1002501.s007.pdf [file pgen.1002501.s007.pdf]

| <i>dsRNAi</i> lines          | Tv4               |      |          |
|------------------------------|-------------------|------|----------|
|                              | w <sup>1118</sup> | expt | days ind |
| <i>eya<sup>dsRNAi</sup></i>  |                   |      |          |
| 43911                        | 36/36             | 0/26 | 15d      |
| eyaCIIID; 43911              | 36/36             | 0/38 | 15d      |
| JF03160                      | 40/40             | 0/27 | 20 d     |
| 108071KK                     | 40/40             | 0/25 | 20 d     |
| <i>dac<sup>dsRNAi</sup></i>  |                   |      |          |
| 4952R-2                      | 52/52             | 0/27 | 10d      |
| dac3, 4952R-2                | 52/52             | 0/41 | 10d      |
| JF02322                      | 35/35             | 0/29 | 15 d     |
| <i>dimm<sup>dsRNAi</sup></i> |                   |      |          |
| 44470                        | 44/44             | 0/14 | 10d      |
| rev4,44470                   | 44/44             | 0/20 | 10d      |
| 103356KK                     | 27/27             | 0/39 | 15 d     |

| <i>dsRNAi</i> lines          | Tv1               |      |          |
|------------------------------|-------------------|------|----------|
|                              | w <sup>1118</sup> | expt | days ind |
| <i>col<sup>dsRNAi</sup></i>  |                   |      |          |
| #24E                         | 29/29             | 0/20 | 10d      |
| <i>eya<sup>dsRNAi</sup></i>  |                   |      |          |
| 43911                        | 25/25             | 0/20 | 20d      |
| <i>dimm<sup>dsRNAi</sup></i> |                   |      |          |
| 44470                        | 18/18             | 0/19 | 10d      |
| rev4,44470                   | 11/11             | 0/20 | 10d      |
